# Supplementary material for: Identification and Genomic Analysis of Transcription Factors in Archaeal Genomes Exemplifies Their Functional Architecture and Evolutionary Origin
Source: PubMed Central journal article supplement — Mol Biol Evol. 2010 Feb 1;27(6):1449–59. doi: 10.1093/molbev/msq033 (PMC2872624; doi:10.1093/molbev/msq033), 2010-02-01

## Supplementary Material

### Figures

**Figure S1. Promoter structure and transcriptional control in archaea.** a) The promoter element is schematically aligned to the scale shown on top. The numbering refers to the coordinates of the base pairs with respect to transcription start site indicated as +1. BRE is a transcription factor binding (TFB) recognition element; TATA stands for the TATA box; INR refers to the initiator element and ORF for the open reading frame. b) Repression at archaeal promoter. The archaeal regulator TrmB is shown to bind to its operator overlapping the BRE-TATA binding site, inhibiting the RNAPol recognition. c) Activation at archaeal promoter. The archaeal regulator Ptr2 binds to its activator binding sites upstream of the BRE-TATA box, facilitating the recruitment of TBP for transcription.

**Figure S2. Distribution of TFs grouped by different lengths in *Escherichia coli* K12.** Intervals of 50 amino acids were considered and the fraction of TFs per interval was computed. In addition, 1000 sets of 314 proteins retrieved randomly were considered to evaluate the significance of the distribution. TFs in *E. coli* were found to follow a similar distribution to the rest of the proteins.

**Figure S3. Boxplot showing the distribution of the lengths of TFs from archaea and bacteria measured as the number of amino acids.** Archaeal TFs were found to show significantly lower lengths compared to bacterial ones (median size of 179 *versus* 236 amino acids,  $p < 2.2 \times 10^{-16}$ , Wilcoxon test). Left most boxes correspond to the TFs from the three most abundant families as well as the remaining TF collection from the archaeal

repertoire. Both the groups were found to show significantly lower lengths compared to bacterial ones ( $p < 2.2 \times 10^{-16}$ , Wilcoxon test).

**Figure S4. Distribution of archaeal TFs shared by the three cellular domains, archaea, bacteria and eukarya.** Homologues of archaeal TFs, across different major kingdoms, grouped by their genome. Blast searches were performed between all TFs previously identified against total sequences of bacterial and eukaryotic genomes. A protein was considered as homologue if the alignment covered at least  $\geq 60\%$  of the query sequence, with an E-value =  $10^{-6}$ . The scale bar represents the proportion of TFs with homologues in bacteria and eukarya.

## Tables

**Table 1. TFs studied experimentally in archaea.**

| Name       | ID     | Role<br>* | Family         | Mode of action                   | Organism                         | Comments         | References                |
|------------|--------|-----------|----------------|----------------------------------|----------------------------------|------------------|---------------------------|
| Bat        | Q9HPU8 | +         | HTH_10         |                                  | <i>Halobacterium salinarum</i>   |                  | Leong et al 1988          |
| GvpE       | P13044 | +/-       | PadR           |                                  | <i>H. salinarum</i>              |                  | Krüger and Pfeifer, 1996  |
| LrpA       | P42180 | -         | FFRP           | Blocks RNAP recruitment          | <i>Pyrococcus furiosus</i>       | Homotetramer     | Dahlke and Thomm, 2002    |
| Lrs14      | O93774 | +/-       | FFRP           | Blocks TBP and TFB recruitment   | <i>Sulfolobus solfataricus</i>   | Homodimer        | Bell and Jackson, 2000    |
| LysM       | Q980W9 | +         | FFRP           |                                  | <i>S. solfataricus</i>           | Homotetramer     | Brinkman, et al 2002      |
| NrpR       | Q8J2Z0 | -         | PF01995        | Probably blocks RNAP             | <i>Methanococcus maripaludis</i> | Tetrameric       | Lie, 2008                 |
| Ptr1, Ptr2 | Q58133 | +/-       | FFRP           | Facilitates TBP binding          | <i>M. jannaschii</i>             | Homotetramer     | Ouhammouch, et al 2001    |
| S7c3       | P81551 | -         | SpoVT_A<br>brB |                                  |                                  |                  | Knapp et al 1998          |
| BldR       |        | +         | MarR           | Transcriptional                  | <i>Sulfolobus solfataricus</i>   |                  | Di Fiore et al 2009       |
| DmsR       |        | +         |                |                                  | <i>Halobacterium sp. NRC1</i>    |                  | Müller and DasSarma, 2005 |
| GvpD       | P13043 | -         |                |                                  | <i>Halobacterium salinarum</i>   |                  | Scheuch et al 2008        |
| LrpB       |        | -         | FFRP           |                                  | <i>Sulfolobus solfataricus</i>   |                  | Peeters et al 2007        |
| Mbf1       |        |           | MarR           |                                  | <i>Sulfolobus solfataricus</i>   |                  | Fiorentino, et al 2007    |
| Mdr1       |        | -         | DtxR           | Blocks RNAP recruitment          | <i>Archaeoglobus fulgidus</i>    |                  | Bell et al., 1999         |
| PhrA       |        | -         | ArsR           | Blocks RNAP recruitment          | <i>Pyrococcus furiosus</i>       |                  | Vierke et al 2003         |
| SurR       |        | -         |                |                                  | <i>Pyrococcus furiosus</i>       |                  | Lipscomb, et al 2009      |
| TrmB       |        | -         | TrmB           | Probably TBP and TFB recruitment | <i>Thermococcus litoralis</i>    | Tetramer/Octamer | Lee et al 2003            |
| TrpY       |        | U         | ?              |                                  | <i>M. thermautotrophicus</i>     |                  | Karr et al 2008           |

ID: Swiss Prot identifier; \* Regulatory roles are defined as: +, activator; -, repressor; +/-, dual; U, unknown.

PF01995 is an unknown domain described in PFAM database. PhrA has been assigned to the ArsR family according to DBD database.

## References

- Bell SD, Cairns SS, Robson RL, Jackson SP (1999) Transcriptional regulation of an archaeal operon in vivo and in vitro. *Mol Cell* 4:971-82
- Bell SD, Jackson SP (2000) Mechanism of autoregulation by an archaeal transcriptional repressor. *J Biol Chem* 275:31624-9
- Brinkman AB, Bell SD, Lebbink RJ, de Vos WM, van der Oost J (2002) The *Sulfolobus solfataricus* Lrp-like protein LysM regulates lysine biosynthesis in response to lysine availability. *J Biol Chem* 277:29537-49
- Dahlke I, Thomm M (2002) A *Pyrococcus* homolog of the leucine-responsive regulatory protein, LrpA, inhibits transcription by abrogating RNA polymerase recruitment. *Nucleic Acids Res* 30:701-10
- Di Fiore A, Fiorentino G, Vitale RM, Ronca R, Amodeo P, Pedone C, Bartolucci S, De Simone G (2009) Structural analysis of BldR from *Sulfolobus solfataricus* provides insights into the molecular basis of transcriptional activation in archaea by MarR family proteins. *J Mol Biol* 388:559-69
- Fiorentino G, Ronca R, Cannio R, Rossi M, Bartolucci S (2007) MarR-like transcriptional regulator involved in detoxification of aromatic compounds in *Sulfolobus solfataricus*. *J Bacteriol* 189:7351-60
- Karr EA, Sandman K, Lurz R, Reeve JN (2008) TrpY regulation of trpB2 transcription in *Methanothermobacter thermoautotrophicus*. *J Bacteriol* 190:2637-41
- Kruger K, Pfeifer F (1996) Transcript analysis of the c-vac region and differential synthesis of the two regulatory gas vesicle proteins GvpD and GvpE in *Halobacterium salinarium* PHH4. *J Bacteriol* 178:4012-9
- Lee SJ, Engelmann A, Horlacher R, Qu Q, Vierke G, Hebbeln C, Thomm M, Boos W (2003) TrmB, a sugar-specific transcriptional regulator of the trehalose/maltose ABC transporter from the hyperthermophilic archaeon *Thermococcus litoralis*. *J Biol Chem* 278:983-90
- Leong D, Pfeifer F, Boyer H, Betlach M (1988) Characterization of a second gene involved in bacterio-opsin gene expression in a halophilic archaeobacterium. *J Bacteriol* 170:4903-9
- Lie TJ, Leigh JA (2007) Genetic screen for regulatory mutations in *Methanococcus maripaludis* and its use in identification of induction-deficient mutants of the euryarchaeal repressor NrpR. *Appl Environ Microbiol* 73:6595-600
- Lipscomb GL, Keese AM, Cowart DM, Schut GJ, Thomm M, Adams MW, Scott RA (2009) SurR: a transcriptional activator and repressor controlling hydrogen and elemental sulphur metabolism in *Pyrococcus furiosus*. *Mol Microbiol* 71:332-49
- Muller JA, DasSarma S (2005) Genomic analysis of anaerobic respiration in the archaeon *Halobacterium* sp. strain NRC-1: dimethyl sulfoxide and trimethylamine N-oxide as terminal electron acceptors. *J Bacteriol* 187:1659-67
- Oppermann UC, Knapp S, Bonetto V, Ladenstein R, Jornvall H (1998) Isolation and structure of repressor-like proteins from the archaeon *Sulfolobus solfataricus*. Co-purification of RNase A with Sso7c. *FEBS Lett* 432:141-4
- Ouhammouch M, Dewhurst RE, Hausner W, Thomm M, Geiduschek EP (2003) Activation of archaeal transcription by recruitment of the TATA-binding protein. *Proc Natl Acad Sci U S A* 100:5097-102
- Peeters E, Wartel C, Maes D, Charlier D (2007) Analysis of the DNA-binding sequence specificity of the archaeal transcriptional regulator Ss-LrpB from *Sulfolobus solfataricus* by systematic mutagenesis and high resolution contact probing. *Nucleic Acids Res* 35:623-33
- Scheuch S, Marschhaus L, Sartorius-Neef S, Pfeifer F (2008) Regulation of gvp genes encoding gas vesicle proteins in halophilic Archaea. *Arch Microbiol* 190:333-9
- Vierke G, Engelmann A, Hebbeln C, Thomm M (2003) A novel archaeal transcriptional regulator of heat shock response. *J Biol Chem* 278:18-26

**Table S2. Archaeal genomes analyzed in this work.** Columns are as follows: Cellular division, Organism, GenBank identifiers, Life-Style, Number of predicted ORFs and Total number of transcription factors.

| <b>DIVISION</b> | <b>Organism</b>                            | <b>ID_GENBANK</b>    | <b>LIFE STYLE</b>                                         | <b>ORFS</b> | <b>TFS</b> |
|-----------------|--------------------------------------------|----------------------|-----------------------------------------------------------|-------------|------------|
| Crenarchaeota   | <i>Aeropyrum pernix K1</i>                 | NC_000854            | Aerobic hyperthermophilic archaeon                        | 1700        | 69         |
| Crenarchaeota   | <i>Caldivirga maquilingensis IC-167</i>    | NC_009954            | Hyperthermophilic crenarchaeota                           | 1963        | 61         |
| Crenarchaeota   | <i>Hyperthermus butylicus DSM 5456</i>     | NC_008818            | Extreme hyperthermophilic archeon                         | 1602        | 56         |
| Crenarchaeota   | <i>Ignicoccus hospitalis KIN4/I</i>        | NC_009776            | Isolated from gravel from the Kolbeinsey Ridge            | 1434        | 32         |
| Crenarchaeota   | <i>Metallosphaera sedula DSM 5348</i>      | NC_009440            | Acid-loving thermophile which can oxidize coal and pyrite | 2256        | 82         |
| Crenarchaeota   | <i>Nitrosopumilus maritimus SCM1</i>       | NC_010085            | Autotrophic ammonia-oxidizing Archaea                     | 1795        | 58         |
| Crenarchaeota   | <i>Pyrobaculum aerophilum str. IM2</i>     | NC_003364            | Nitrate-reducing hyperthermophilic archeon                | 2605        | 79         |
| Crenarchaeota   | <i>Pyrobaculum arsenaticum DSM 13514</i>   | NC_009376            | Arsenate-reducing hyperthermophile                        | 2299        | 62         |
| Crenarchaeota   | <i>Pyrobaculum caldifontis JCM 11548</i>   | NC_009073            | Facultatively anaerobic hyperthermophile                  | 2149        | 55         |
| Crenarchaeota   | <i>Pyrobaculum islandicum DSM 4184</i>     | NC_008701            | Hyperthermophilic anaerobe                                | 1978        | 52         |
| Crenarchaeota   | <i>Staphylothermus marinus F1</i>          | NC_009033            | Hyperthermophilic archaeon                                | 1570        | 48         |
| Crenarchaeota   | <i>Sulfolobus acidocaldarius DSM 639</i>   | NC_007181            | Extreme thermoacidophilic sulfur-oxidizing archeon        | 2223        | 95         |
| Crenarchaeota   | <i>Sulfolobus solfataricus P2</i>          | NC_002754            | Hyperthermophilic acidophilic sulfur-metabolizing archeon | 2977        | 113        |
| Crenarchaeota   | <i>Sulfolobus tokodaii str. 7</i>          | NC_003106            | Hyperthermophilic acidophilic sulfur metabolizing archeon | 2825        | 125        |
| Crenarchaeota   | <i>Thermofilum pendens Hrk 5</i>           | NC_008698            | Hyperthermophilic crenarchaeota                           | 1876        | 65         |
| Crenarchaeota   | <i>Thermoproteus neutrophilus V24Sta</i>   | NC_010525            | Hyperthermophilic crenarchaeota                           | 1966        | 59         |
| Euryarchaeota   | <i>Archaeoglobus fulgidus DSM 4304</i>     | NC_000917            | Hyperthermophilic sulfate-reducing archaeon               | 2420        | 106        |
| Euryarchaeota   | <i>Candidatus Methanoregula boonei 6A8</i> | NC_009712            | Acidophilic methanogen                                    | 2450        | 67         |
| Euryarchaeota   | <i>Haloarcula marismortui ATCC 43049</i>   | NC_006396, NC_006397 | Chemoheterotrophic obligate extreme halophilic archeon    | 4240        | 204        |
| Euryarchaeota   | <i>Halobacterium salinarum R1</i>          | NC_010364            | Chemoheterotrophic obligate extreme halophilic archeon    | 2749        | 113        |

|               |                                                             |            |                                                                         |      |     |
|---------------|-------------------------------------------------------------|------------|-------------------------------------------------------------------------|------|-----|
| Euryarchaeota | <i>Halobacterium sp. NRC-1</i>                              | NC_002607  | Chemoheterotrophic obligate extreme halophilic archeon                  | 2622 | 122 |
| Euryarchaeota | <i>Haloquadratum walsbyi DSM 16790</i>                      | NC_008212  | A uniquely square archaeon                                              | 2646 | 94  |
| Euryarchaeota | <i>Methanobrevibacter smithii ATCC 35061</i>                | NC_009515  | Sewage digester isolate/Human fecal bacterium                           | 1793 | 41  |
| Euryarchaeota | <i>Methanocaldococcus jannaschii DSM 2661</i>               | NC_000909  | Methane-producing thermophilic archeon                                  | 1786 | 64  |
| Euryarchaeota | <i>Methanococcoides burtonii DSM 6242</i>                   | NC_007955  | Psychrotolerant methanogenic archeon                                    | 2273 | 75  |
| Euryarchaeota | <i>Methanococcus aeolicus Nankai-3</i>                      | NC_009635  | Anaerobic methane-producing archeon                                     | 1490 | 34  |
| Euryarchaeota | <i>Methanococcus maripaludis C5</i>                         | NC_009135  | Anaerobic methane-producing archaeon                                    | 1822 | 52  |
| Euryarchaeota | <i>Methanococcus maripaludis C6</i>                         | NC_009975  | Isolated from intertidal sediments                                      | 1826 | 47  |
| Euryarchaeota | <i>Methanococcus maripaludis C7</i>                         | NC_009637  | Anaerobic methane-producing archeon                                     | 1788 | 48  |
| Euryarchaeota | <i>Methanococcus maripaludis S2</i>                         | NC_005791  | Anaerobic methane-producing archeon                                     | 1722 | 64  |
| Euryarchaeota | <i>Methanococcus vannielii SB</i>                           | NC_009634. | A methane-producing motile coccus                                       | 1678 | 52  |
| Euryarchaeota | <i>Methanocorpusculum labreanum Z</i>                       | NC_008942  | Methanogen isolated from the LaBrea Tar Pits                            | 1739 | 52  |
| Euryarchaeota | <i>Methanoculleus marisnigri JR1</i>                        | NC_009051  | Methanogen present in marine and freshwater sediments                   | 2489 | 67  |
| Euryarchaeota | <i>Methanopyrus kandleri AV19</i>                           | NC_003551  | Thermophilic methanogenic archaeon                                      | 1687 | 36  |
| Euryarchaeota | <i>Methanosaeta thermophila PT</i>                          | NC_008553  | Produces methane from acetate                                           | 1696 | 34  |
| Euryarchaeota | <i>Methanosarcina acetivorans C2A</i>                       | NC_003552  | Anaerobic methane-producing archeon                                     | 4540 | 158 |
| Euryarchaeota | <i>Methanosarcina barkeri str. Fusaro</i>                   | NC_007355  | Anaerobic methane-producing archeon                                     | 3624 | 124 |
| Euryarchaeota | <i>Methanosarcina mazei Go1</i>                             | NC_003901  | Anaerobic methane-producing archeon                                     | 3370 | 127 |
| Euryarchaeota | <i>Methanosphaera stadtmanae DSM 3091</i>                   | NC_007681  | Methanogen that uses methanol and hydrogen to produce methane           | 1534 | 41  |
| Euryarchaeota | <i>Methanospirillum hungatei JF-1</i>                       | NC_007796  | Methanogenic archaeon with unusual filamentous structure                | 3139 | 73  |
| Euryarchaeota | <i>Methanothermobacter thermoautotrophicus str. Delta H</i> | NC_000916  | Thermophilic methane-producing archaeon                                 | 1873 | 58  |
| Euryarchaeota | <i>Natronomonas pharaonis DSM 2160</i>                      | NC_007426  | Extreme haloalkaliphilic archeon                                        | 2822 | 122 |
| Euryarchaeota | <i>Picrophilus torridus DSM 9790</i>                        | NC_005877  | Thermoacidophilic organism that grows at extremes of temperature and pH | 1535 | 64  |
| Euryarchaeota | <i>Pyrococcus abyssi GE5</i>                                | NC_000868  | Anaerobic hyperthermophilic archeon                                     | 1898 | 98  |
| Euryarchaeota | <i>Pyrococcus furiosus DSM 3638</i>                         | NC_003413  | Anaerobic hyperthermophilic                                             | 2125 | 85  |

|               |                                                |           |                                               |      |     |
|---------------|------------------------------------------------|-----------|-----------------------------------------------|------|-----|
|               |                                                |           | archeon                                       |      |     |
| Euryarchaeota | <i>Pyrococcus horikoshii</i> OT3               | NC_000961 | Anaerobic hyperthermophilic archaeon          | 1955 | 94  |
| Euryarchaeota | <i>Thermococcus kodakarensis</i> KOD1          | NC_006624 | Hyperthermophilic archaeon                    | 2306 | 105 |
| Euryarchaeota | <i>Thermoplasma acidophilum</i> DSM 1728       | NC_002578 | Thermophilic acidophilic mycoplasma           | 1482 | 64  |
| Euryarchaeota | <i>Thermoplasma volcanium</i> GSS1             | NC_002689 | Thermoacidophilic mycoplasma                  | 1499 | 56  |
| Euryarchaeota | uncultured methanogenic archaeon RC-1          | NC_009464 | A key methano producer in the rhizome of rice | 3085 | 103 |
| Korarchaeota  | <i>Candidatus Korarchaeum cryptofilum</i> OPF8 | NC_010482 | An isolated korarchaeote                      | 1602 | 55  |
| Nanoarchaeum  | <i>Nanoarchaeum equitans</i> Kin4-M            | NC_005213 | Hyperthermophilic anaerobic obligate symbiont | 536  | 8   |

Figure S1

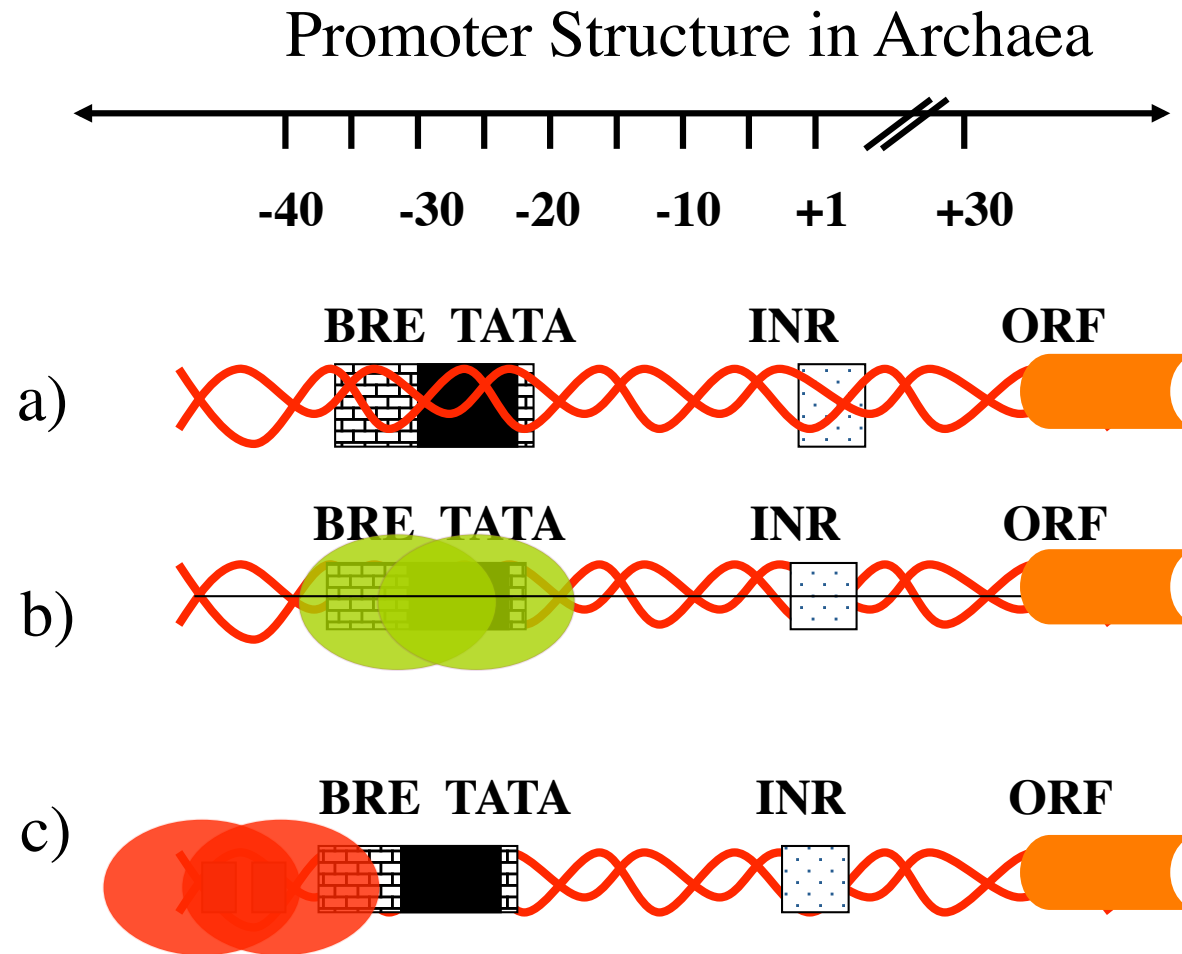



Figure S2

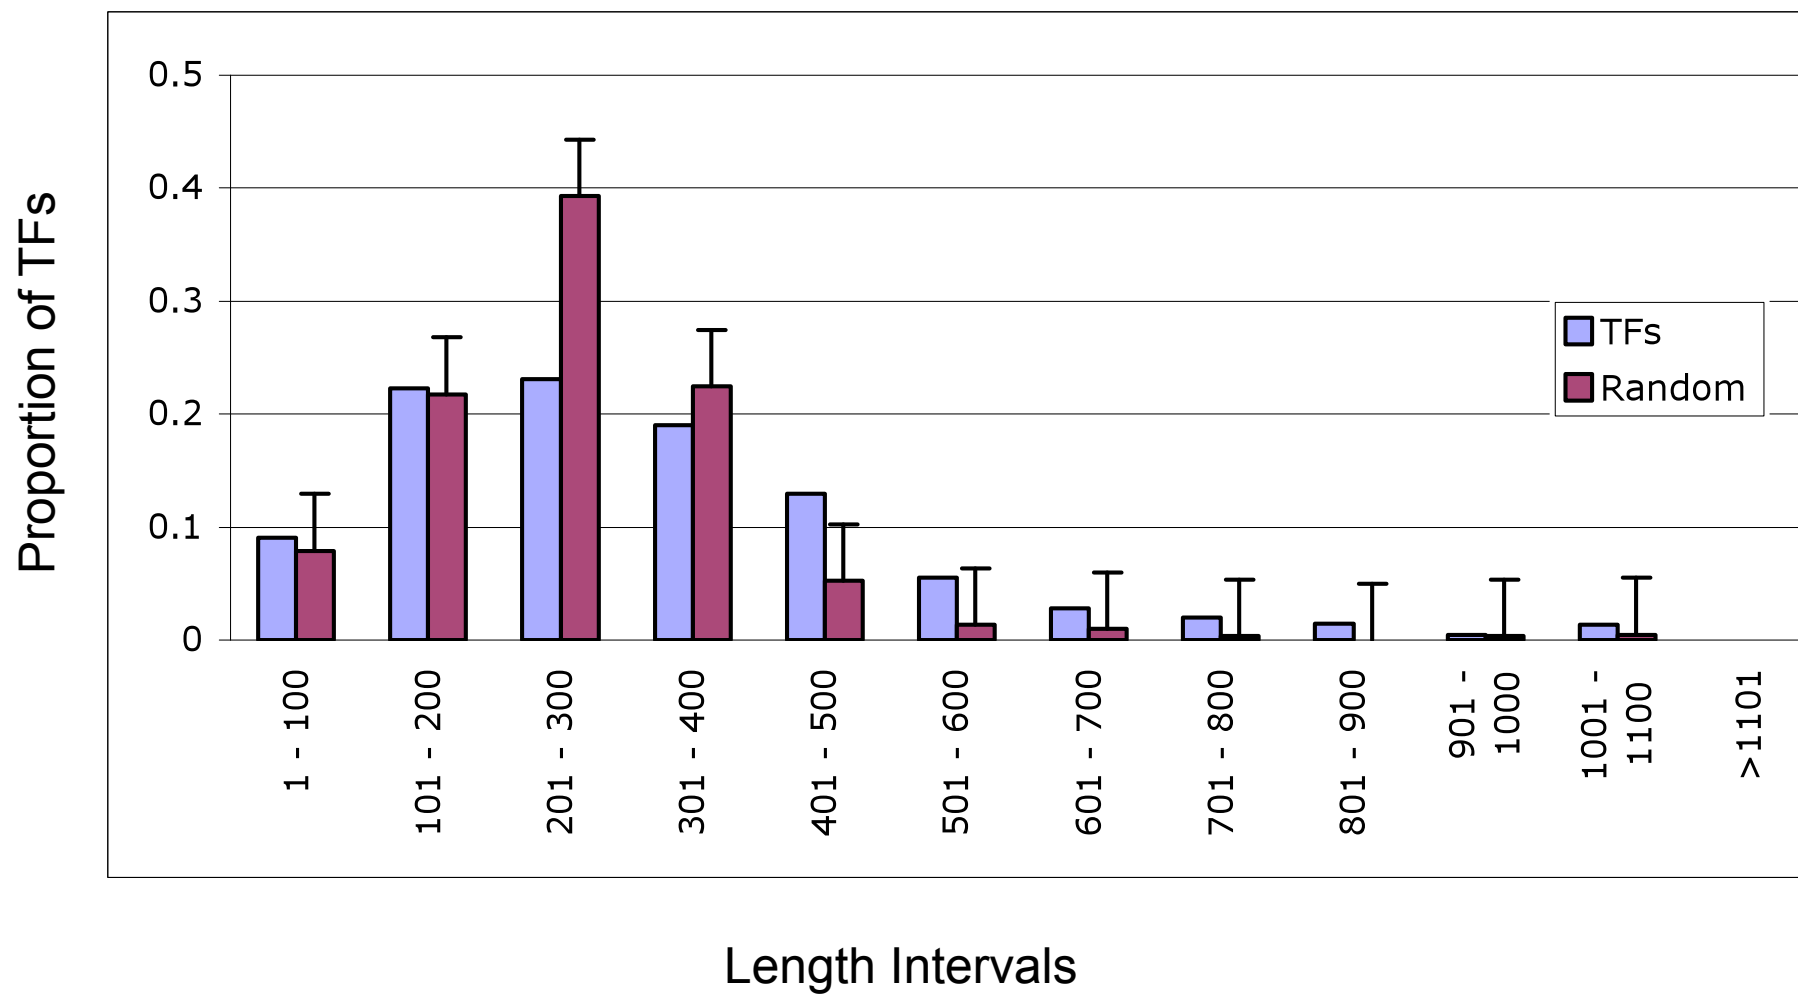

Figure S3

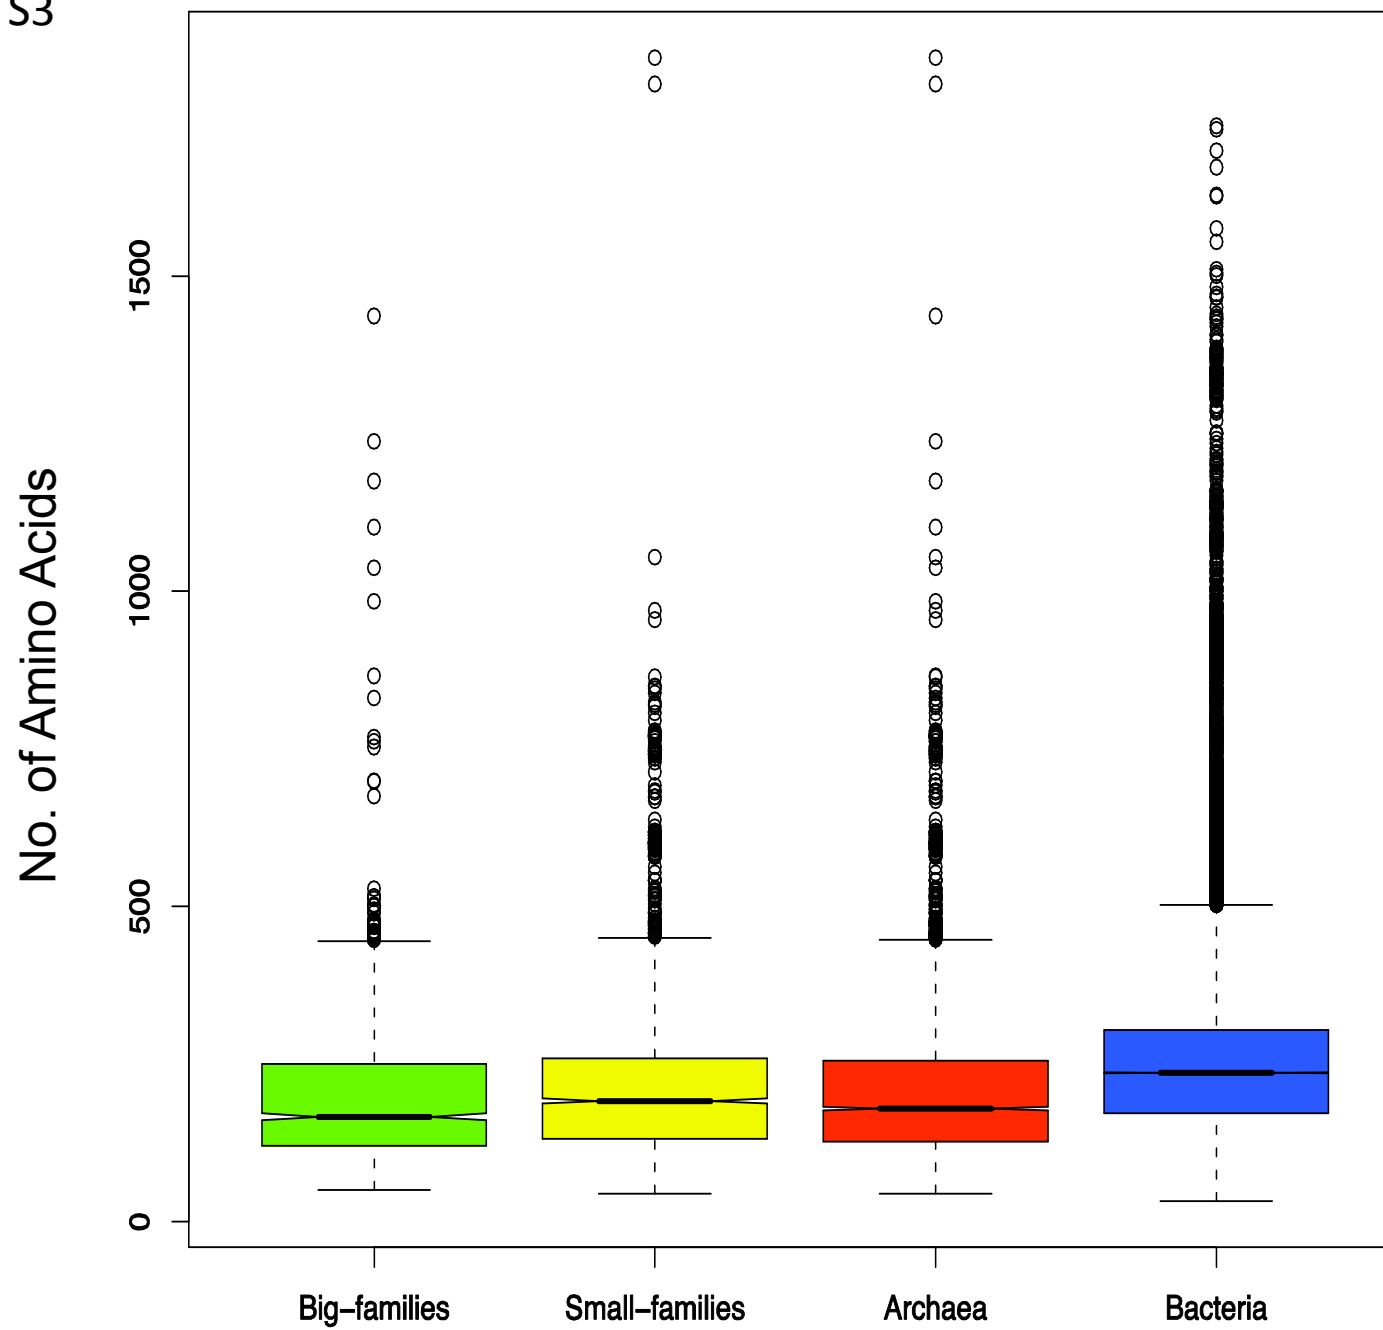

Figure S4

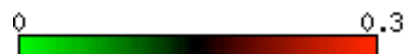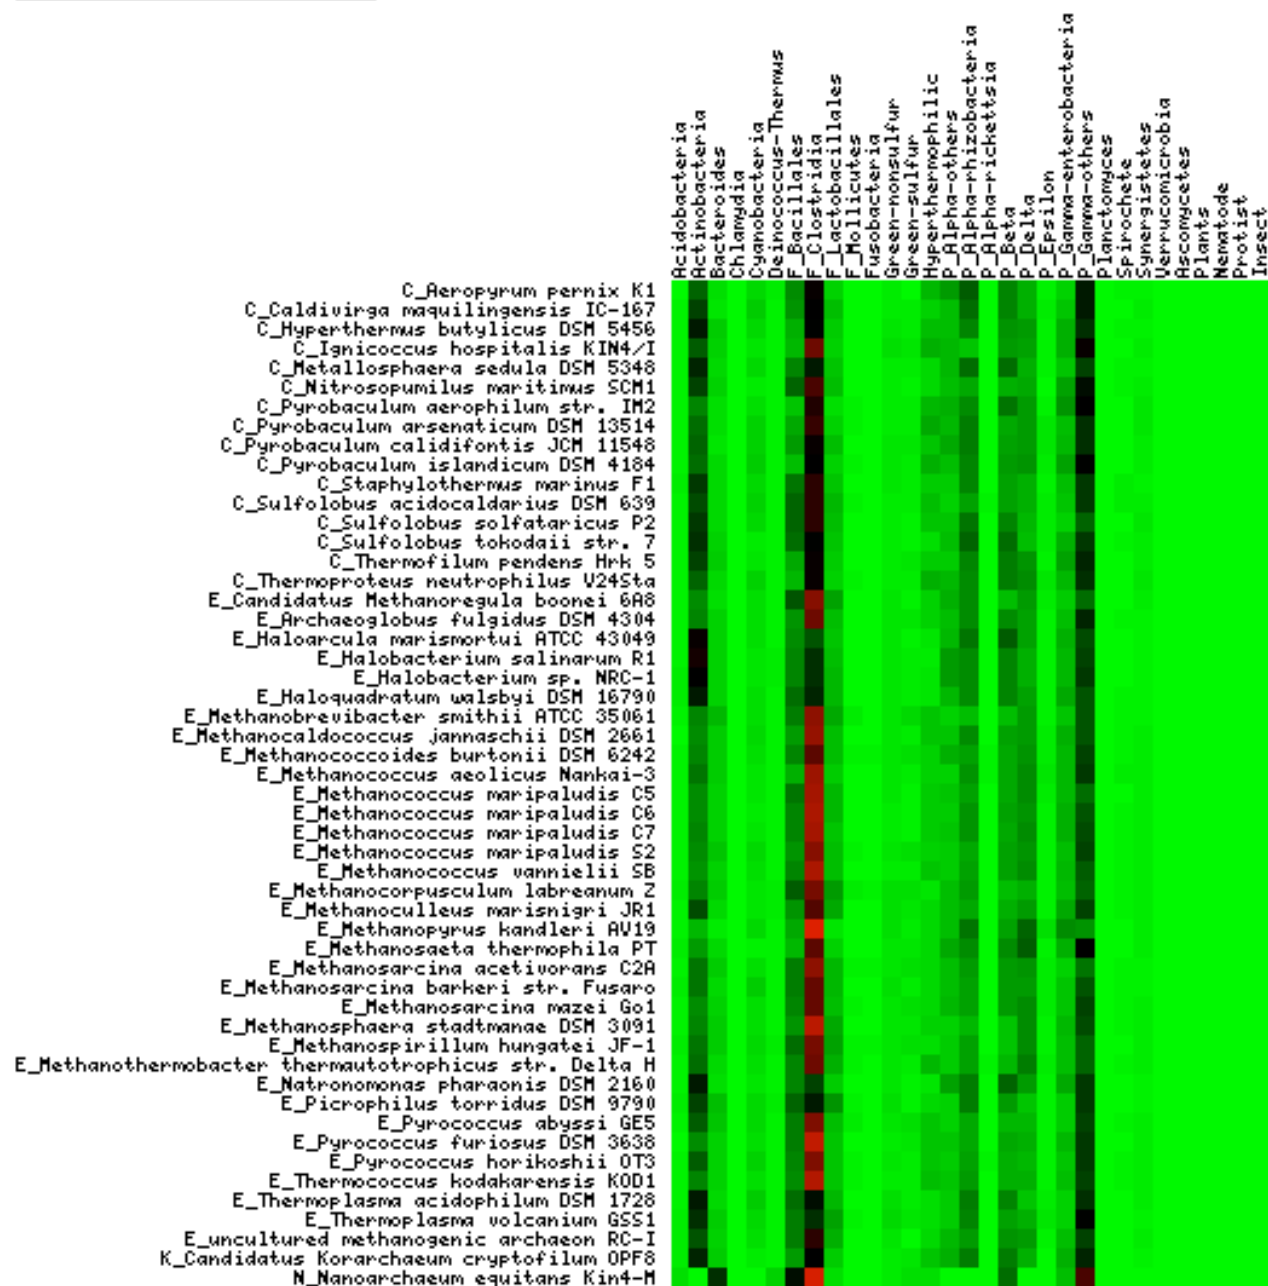

Figure 1

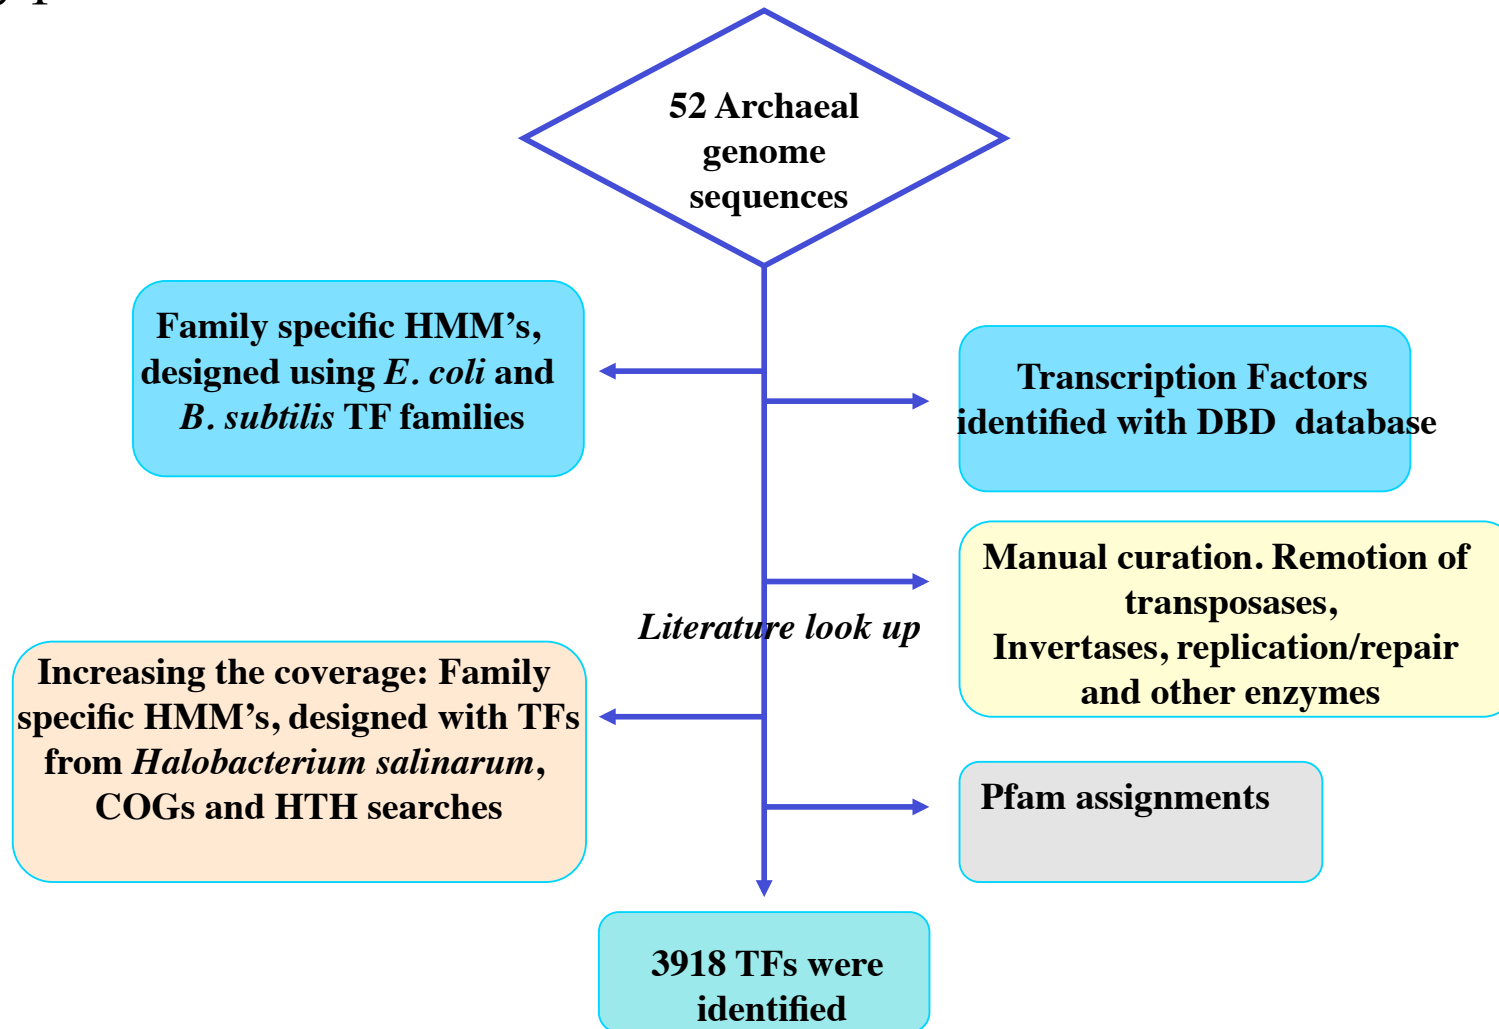

Figure 2a

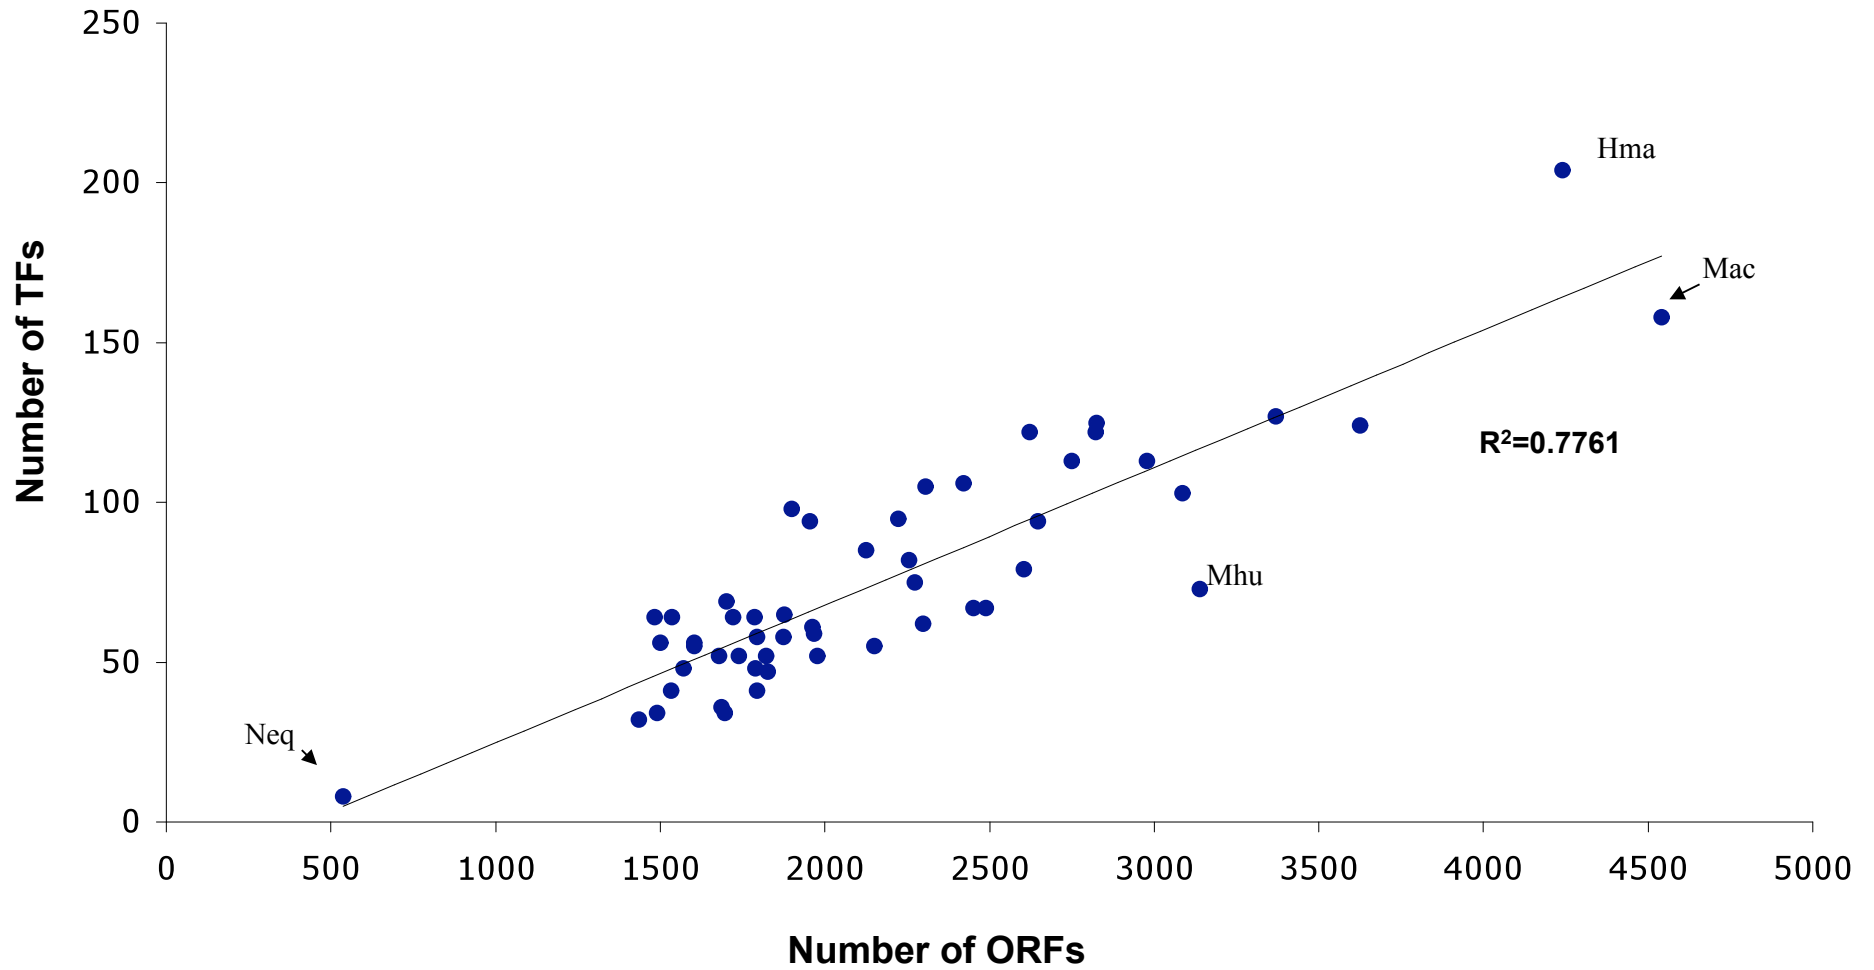

Figure 2b

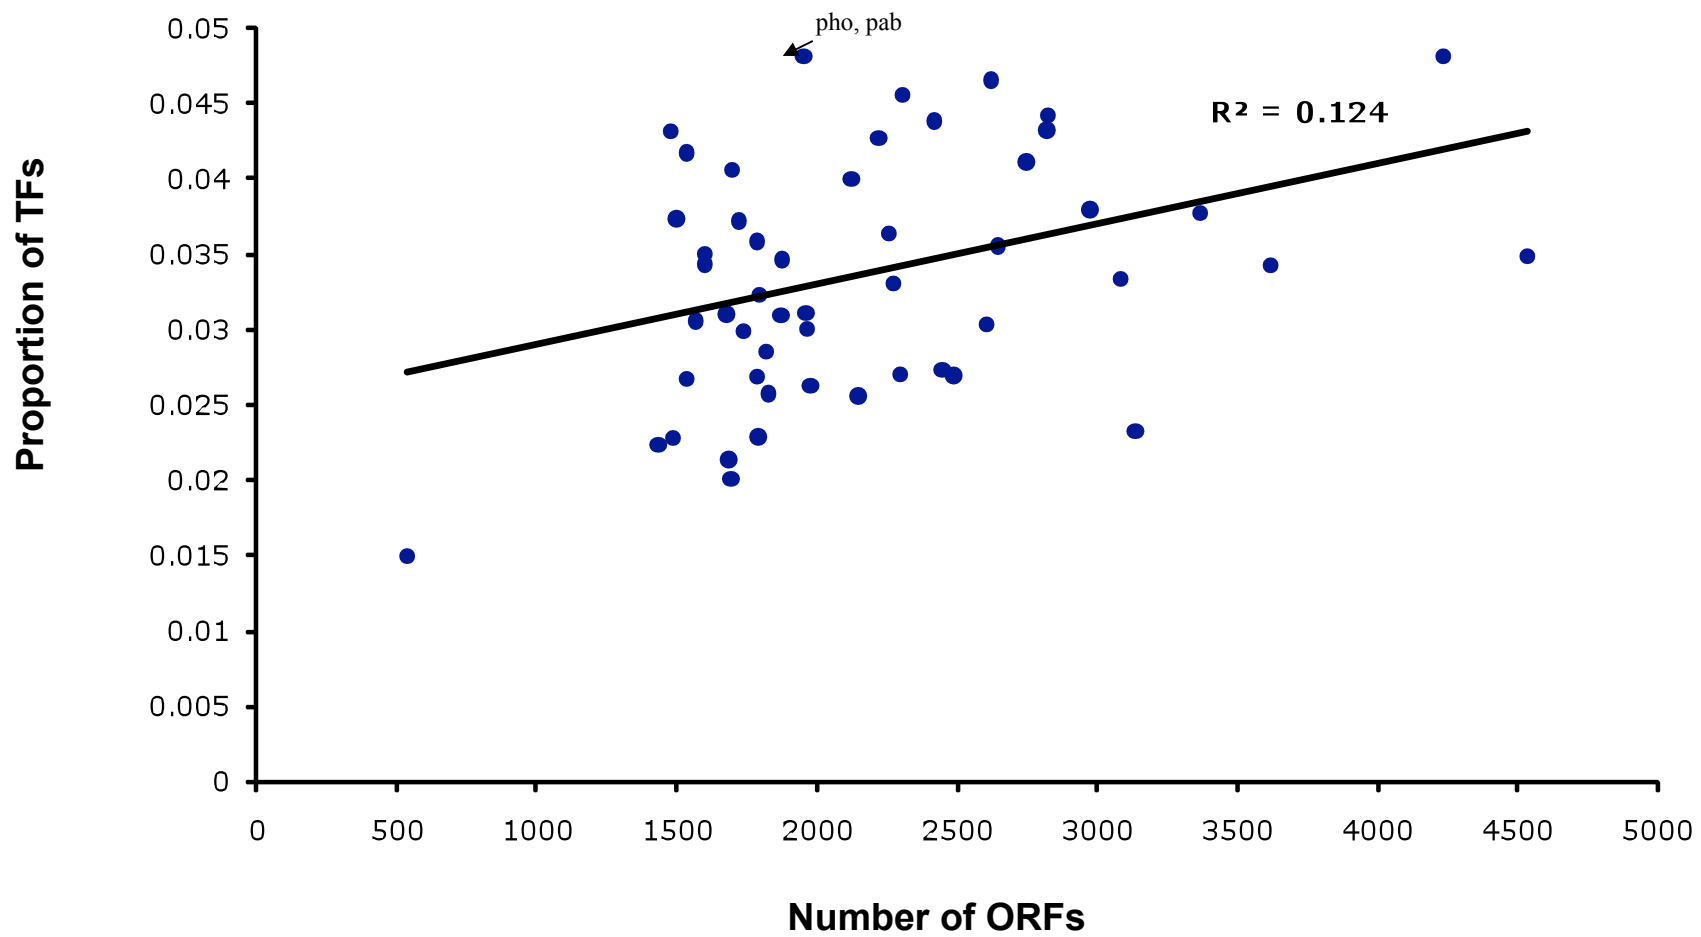

Figure 3

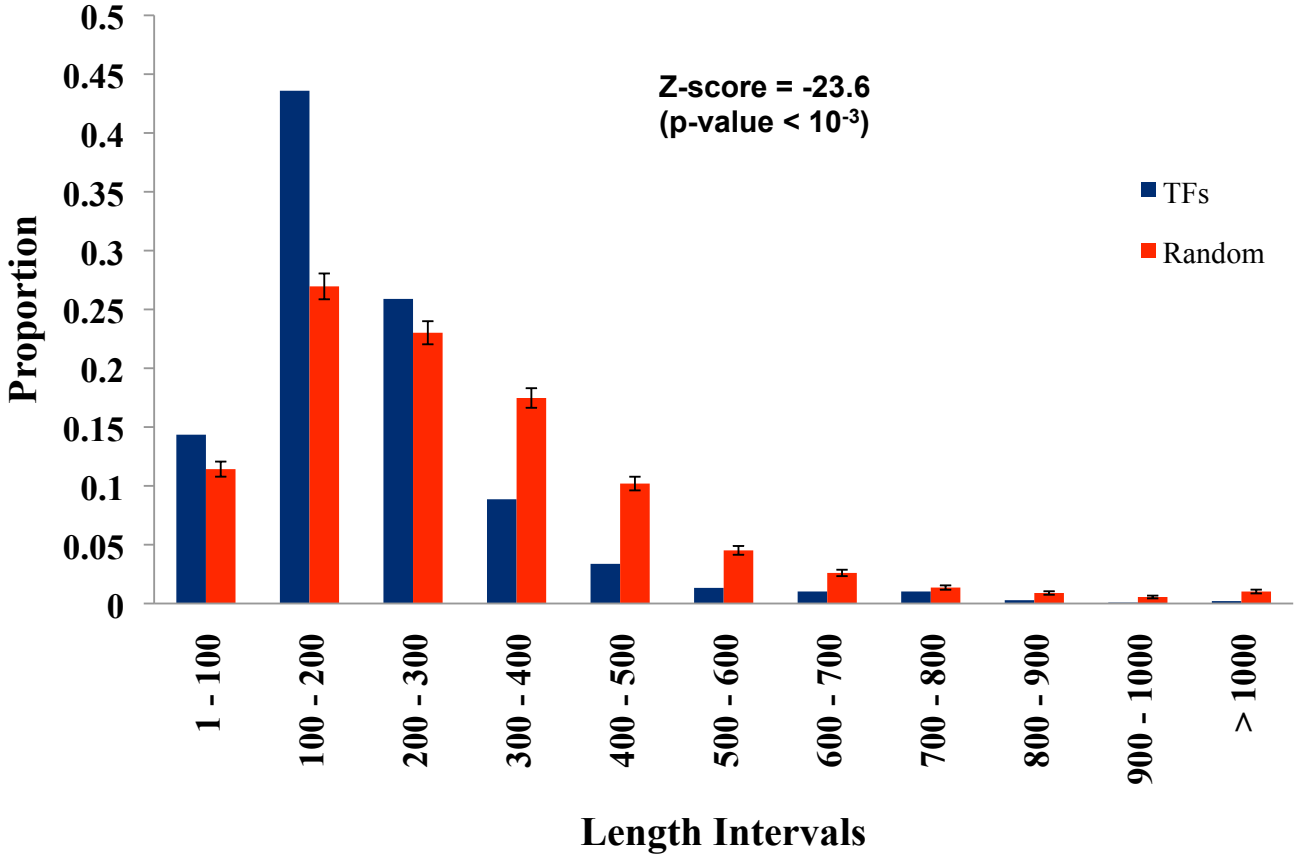

Figure 4

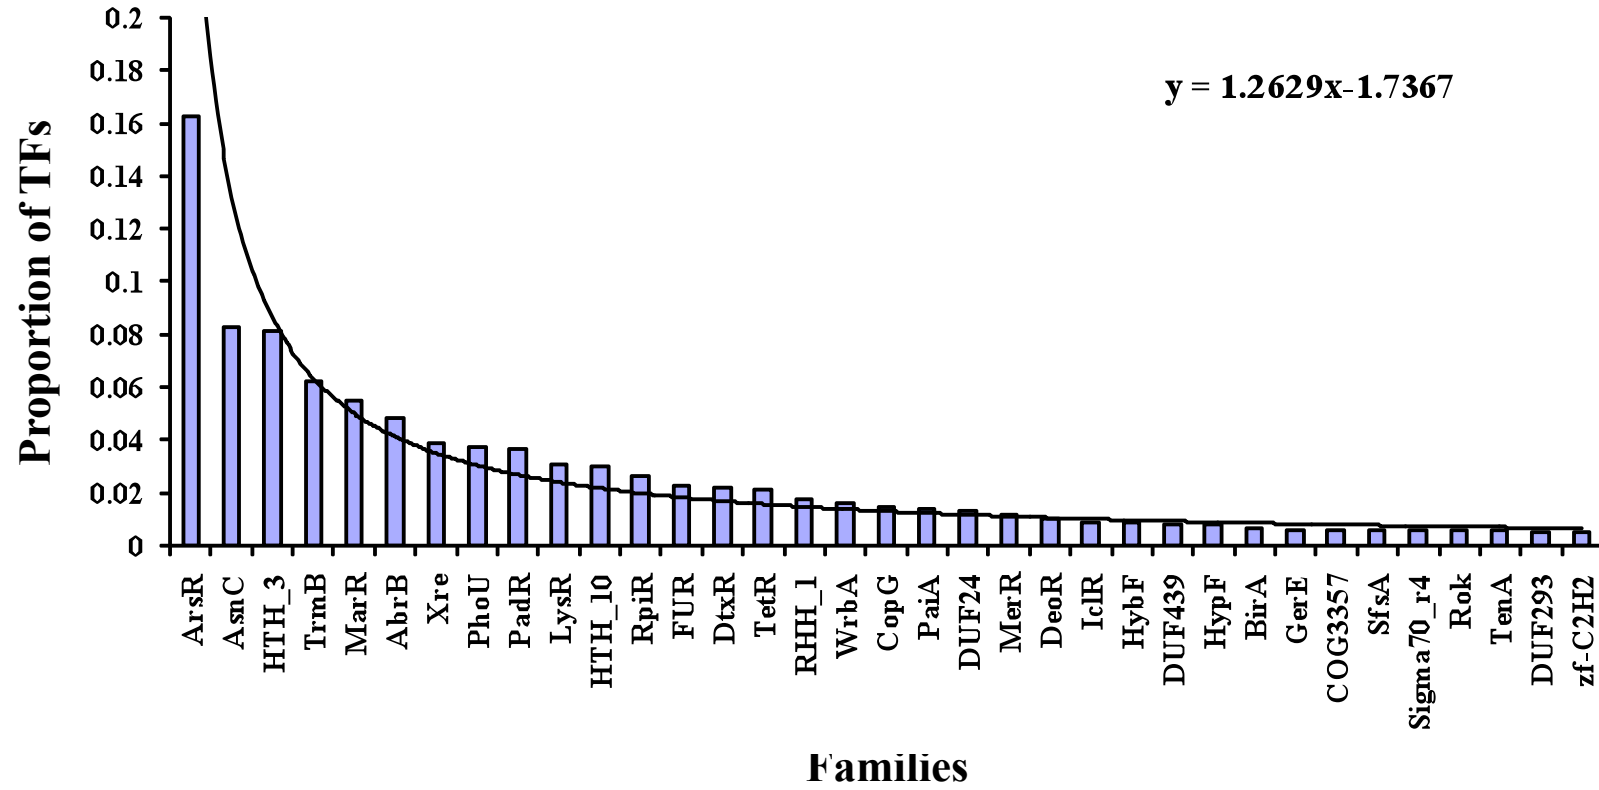

Supplement: msq033_1.pdf [file msq033_1.pdf]
